# Supplementary material
Source: Springer Nature journal article supplement (https://www.springermedizin.de/resource/supplementary/12906_2006_118_MOESM12_ESM.pdf/9524108)
Supplement: MOESM12 [file 9524108]

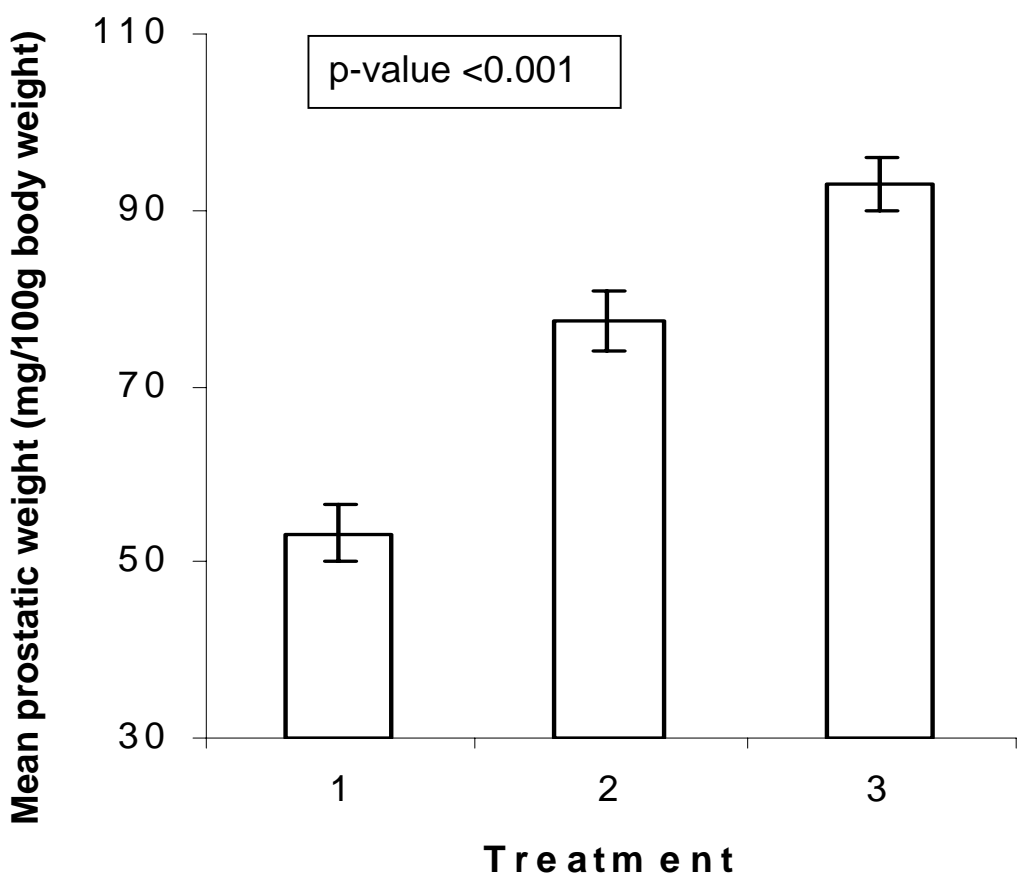

p-value <0.001

**Lane 1. Control**

**Lane 2. Testosterone alone (5000ug)**

**Lane 3. Testosterone (5000ug) + Ethanolic EU extract (50m g dry weight)**
